# Supplementary material for: LQFM289: Electrochemical and Computational Studies of a New Trimetozine Analogue for Anxiety Treatment
Source: MDPI journal article supplement (doi:10.3390/ijms241914575), 2023-09-26
Supplement: s1 [file s1]

## Supplementary Materials

**Table S1.** Crystal data and structure refinement for LQFM289 (**3**).

|                                   |                                                  |                  |
|-----------------------------------|--------------------------------------------------|------------------|
| Identification code               | ORSY23024                                        |                  |
| Empirical formula                 | C <sub>19</sub> H <sub>29</sub> N O <sub>3</sub> |                  |
| Formula weight                    | 319.43                                           |                  |
| Temperature                       | 287(2) K                                         |                  |
| Wavelength                        | 0.71073 Å                                        |                  |
| Crystal system                    | Monoclinic                                       |                  |
| Space group                       | P 2 <sub>1</sub> /n                              |                  |
| Unit cell dimensions              | a = 17.3332(14) Å                                | α = 90°.         |
|                                   | b = 12.2252(9) Å                                 | β = 110.427(3)°. |
|                                   | c = 18.9650(15) Å                                | γ = 90°.         |
| Volume                            | 3766.0(5) Å <sup>3</sup>                         |                  |
| Z                                 | 8                                                |                  |
| Density (calculated)              | 1.127 Mg/m <sup>3</sup>                          |                  |
| Absorption coefficient            | 0.075 mm <sup>-1</sup>                           |                  |
| F(000)                            | 1392                                             |                  |
| Crystal size                      | 0.347 x 0.237 x 0.060 mm <sup>3</sup>            |                  |
| Theta range for data collection   | 1.372 to 25.029°.                                |                  |
| Index ranges                      | -20 ≤ h ≤ 20, -14 ≤ k ≤ 14, -22 ≤ l ≤ 22         |                  |
| Reflections collected             | 75266                                            |                  |
| Independent reflections           | 6655 [R(int) = 0.1073]                           |                  |
| Completeness to theta = 25.000°   | 100.0 %                                          |                  |
| Refinement method                 | Full-matrix least-squares on F <sup>2</sup>      |                  |
| Data / restraints / parameters    | 6655 / 0 / 430                                   |                  |
| Goodness-of-fit on F <sup>2</sup> | 1.130                                            |                  |
| Final R indices [I > 2σ(I)]       | R1 = 0.1788, wR2 = 0.4337                        |                  |
| R indices (all data)              | R1 = 0.2087, wR2 = 0.4521                        |                  |
| Extinction coefficient            | 0.0041(15)                                       |                  |
| Largest diff. peak and hole       | 0.880 and -0.449 e.Å <sup>-3</sup>               |                  |

**Table S2.** Crystal data and structure refinement for TRIMETOZINE (2).

|                                   |                                                       |                                                                             |
|-----------------------------------|-------------------------------------------------------|-----------------------------------------------------------------------------|
| Empirical formula                 | C <sub>14</sub> H <sub>19</sub> N O <sub>5</sub>      |                                                                             |
| Formula weight                    | 281.30                                                |                                                                             |
| Temperature                       | 297(2) K                                              |                                                                             |
| Wavelength                        | 0.71073 Å                                             |                                                                             |
| Crystal system                    | Triclinic                                             |                                                                             |
| Space group                       | P -1                                                  |                                                                             |
| Unit cell dimensions              | a = 8.6525(4) Å<br>b = 9.5424(4) Å<br>c = 9.8544(4) Å | $\alpha$ = 64.2340(10)°.<br>$\beta$ = 77.059(2)°.<br>$\gamma$ = 71.725(2)°. |
| Volume                            | 692.12(5) Å <sup>3</sup>                              |                                                                             |
| Z                                 | 2                                                     |                                                                             |
| Density (calculated)              | 1.350 Mg/m <sup>3</sup>                               |                                                                             |
| Absorption coefficient            | 0.103 mm <sup>-1</sup>                                |                                                                             |
| F(000)                            | 300                                                   |                                                                             |
| Crystal size                      | 0.402 x 0.272 x 0.168 mm <sup>3</sup>                 |                                                                             |
| Theta range for data collection   | 2.307 to 29.700°.                                     |                                                                             |
| Index ranges                      | -12 ≤ h ≤ 12, -13 ≤ k ≤ 13, -13 ≤ l ≤ 13              |                                                                             |
| Reflections collected             | 38484                                                 |                                                                             |
| Independent reflections           | 3918 [R(int) = 0.0463]                                |                                                                             |
| Completeness to theta = 25.000°   | 100.0 %                                               |                                                                             |
| Refinement method                 | Full-matrix least-squares on F <sup>2</sup>           |                                                                             |
| Data / restraints / parameters    | 3918 / 0 / 184                                        |                                                                             |
| Goodness-of-fit on F <sup>2</sup> | 1.084                                                 |                                                                             |
| Final R indices [I > 2σ(I)]       | R <sub>1</sub> = 0.0497, wR <sub>2</sub> = 0.1466     |                                                                             |
| R indices (all data)              | R <sub>1</sub> = 0.0618, wR <sub>2</sub> = 0.1529     |                                                                             |
| Largest diff. peak and hole       | 0.359 and -0.226 e.Å <sup>-3</sup>                    |                                                                             |

**Table S3. Selected bond lengths (Å)**

|             | LQFM289-A  | LQFM289-B  | TMZ        | TUJTAV   | OPT    |
|-------------|------------|------------|------------|----------|--------|
| O1A—C1A     | 1.226 (9)  | 1.238 (10) | 1.2240(15) | 1.223(3) | 1.2157 |
| O2A—C5A     | 1.373 (8)  | 1.333 (9)  | 1.3753(13) | 1.375(1) | 1.3633 |
| O3A—C9A     | 1.405 (12) | 1.378 (14) | 1.4180(19) | 1.414(3) | 1.4137 |
| O3A—C11A    | 1.414 (12) | 1.383 (13) | 1.4210(17) | 1.419(2) | 1.4098 |
| N1A—C1A     | 1.360 (10) | 1.357 (11) | 1.3544(16) | 1.354(2) | 1.3571 |
| N1A—C8A     | 1.455 (10) | 1.438 (11) | 1.4634(15) | 1.463(2) | 1.4555 |
| N1A—C10A    | 1.447 (10) | 1.441 (10) | 1.4623(16) | 1.462(3) | 1.4571 |
| C(1A)-C(2A) | 1.482(10)  | 1.487(10)  | 1.5012(15) | 1.500(2) | 1.4956 |

**Table S4. Selected bond angles (°)**

|                    | LQFM289-A | LQFM289-B | TMZ        | TUJTAV   | OPT    |
|--------------------|-----------|-----------|------------|----------|--------|
| C(1A)-N(1A)-C(8A)  | 120.4(7)  | 120.5(8)  | 120.21(11) | 120.3(1) | 117.99 |
| C(1A)-N(1A)-C(10A) | 124.7(6)  | 125.0(6)  | 125.18(10) | 125.2(1) | 124.46 |
| C(10A)-N(1A)-C(8A) | 112.1(6)  | 114.5(8)  | 112.77(10) | 112.8(1) | 112.14 |
| C(9A)-O(3A)-C(11A) | 111.3(7)  | 110.2(8)  | 109.65(10) | 109.6(1) | 111.42 |
| O(1A)-C(1A)-N(1A)  | 120.1(6)  | 120.1(7)  | 122.17(11) | 122.1(1) | 121.67 |
| O(1A)-C(1A)-C(2A)  | 119.7(6)  | 120.4(7)  | 120.18(10) | 120.2(1) | 120.70 |
| N(1A)-C(1A)-C(2A)  | 120.1(6)  | 119.4(7)  | 117.43(10) | 117.5(1) | 117.55 |

**Table S5. Selected torsion angles (°)**

|              | LQFM289-A | LQFM289-B | TMZ       | TUJTAV    | 289A-OPT |
|--------------|-----------|-----------|-----------|-----------|----------|
| O1-C1-C2-C7  | 36(1)     | 50(1)     | 46.6(2)   | 46.4(2)   | 37.61    |
| O1-C1-N1-C8  | 6(1)      | 8(1)      | 5.4(2)    | 5.8(2)    | 2.91     |
| O1-C1-N1-C10 | -154.0(8) | -170.7(9) | -158.1(1) | -158.1(1) | -149.03  |
| C2-C1-N1-C10 | 30(1)     | 13(1)     | 27.3(2)   | 26.8(2)   | 34.15    |
| C1-N1-C8-C10 | -162(1)   | -179(1)   | -165.3(2) | -165.7(2) | -155.25  |
| N1-C8-C9-O3  | 55(1)     | -56(1)    | -56.7(2)  | -55.7 (2) | 55.8     |

**Table S6.** *Hydrogen bonds for LQFM289 [ $\text{\AA}$  and  $^\circ$ ]*

| D-H...A               | d(D-H) | d(H...A) | d(D...A) | $\angle(\text{DHA})$ |
|-----------------------|--------|----------|----------|----------------------|
| O(2B)-H(2B)...O(1B)#1 | 0.82   | 2.21     | 2.819(9) | 131.0                |
| O(2A)-H(2A)...O(1A)#2 | 0.82   | 2.20     | 2.768(7) | 127.0                |

Symmetry transformations used to generate equivalent atoms:

#1  $-x+3/2, y+1/2, -z+1/2$  #2  $-x+1/2, y+1/2, -z+1/2$

**Table S7.** *Hydrogen bonds for TMZ [ $\text{\AA}$  and  $^\circ$ ].*

| D-H...A             | d(D-H) | d(H...A) | d(D...A)   | $\angle(\text{DHA})$ |
|---------------------|--------|----------|------------|----------------------|
| C(13)-H(13A)...O(5) | 0.96   | 2.51     | 3.0495(18) | 115.6                |

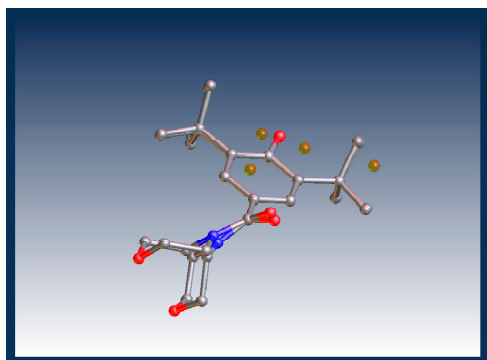

**Figure S1.** Superposition of LQFM289A and LQFM 289B by a proper transformation matrix.

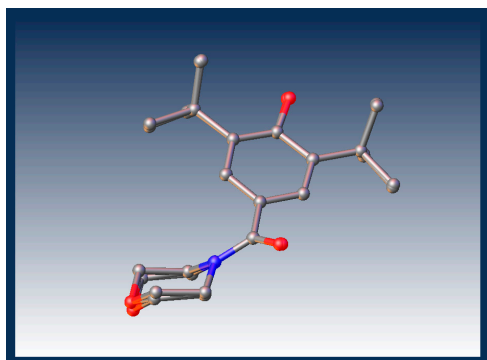

(a)

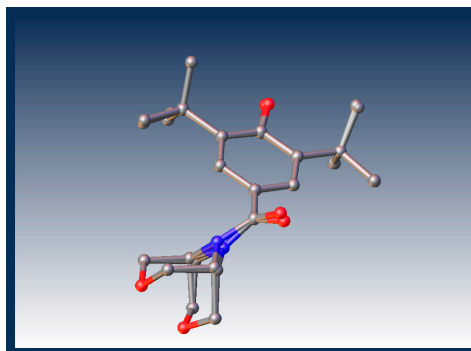

(b)

**Figure S2.** Superposition of: (a) LQFM289A and LQFM289A-OPT and (b) LQFM289B and LQFM289A-OPT.

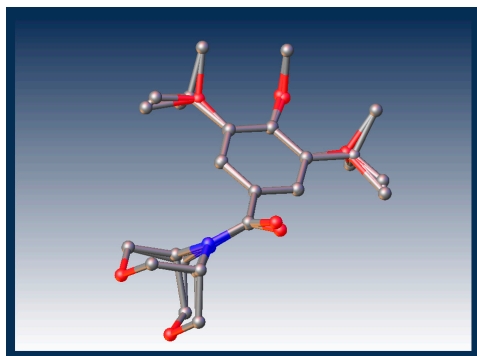

(a)

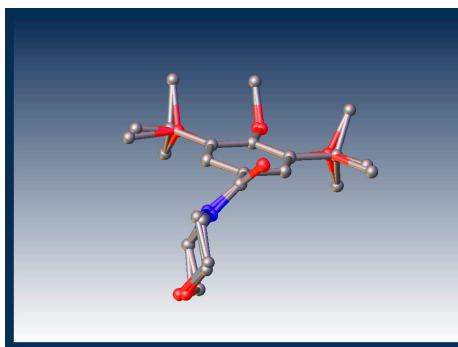

(b)

**Figure S3:** Superposition of: (a) LQFM289A and TMZ and (b) LQFM289B and TMZ. In both, TMZ was superposed to LQFM289A by an improper matrix transformation.

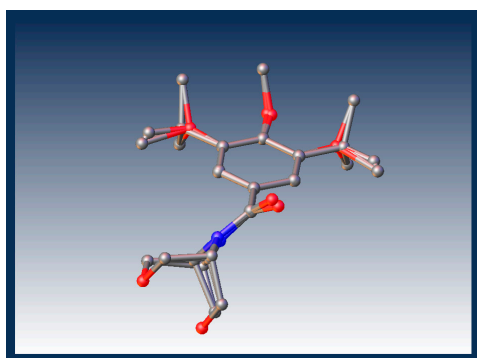

**Figure S4.** Superposition of LQFM289A and TUJTAV by an improper transformation matrix.
